# Supplementary material for: Evaluation of Clinical and Safety Outcomes of Neoadjuvant Immunotherapy Combined With Chemotherapy for Patients With Resectable Esophageal Cancer: A Systematic Review and Meta-analysis
Source: PubMed Central journal article supplement (PMC9631099; doi:10.1001/jamanetworkopen.2022.39778), 2022-11-02

## Supplemental Online Content

Ge F, Huo Z, Cai X, et al. Evaluation of clinical and safety outcomes of neoadjuvant immunotherapy combined with chemotherapy for patients with resectable esophageal cancer: a systematic review and meta-analysis. *JAMA Netw Open*. 2022;5(11):e2239778. doi:10.1001/jamanetworkopen.2022.39778

**eTable 1.** Inclusion and Exclusion Criteria

**eTable 2.** Methodological Quality Assessment of Included Studies: MINORS

**eTable 3.** Summary of Surgical Complications in Included Studies

**eFigure 1.** The Geographical Distribution of Included Studies

**eFigure 2.** Methodological Quality Assessment of Included Studies

**eFigure 3.** Forest Plot of the Primary Outcomes for Clinical Outcomes in Neoadjuvant Immunotherapy Combined With Chemotherapy in ESCC Stratified by ICI Types

**eFigure 4.** Forest Plot of the Secondary Outcomes for Clinical Outcomes in Neoadjuvant Immunotherapy Combined With Chemotherapy in ESCC Stratified by ICI Types

**eFigure 5.** Forest Plot of the Outcomes for Safety in Neoadjuvant Immunotherapy Combined With Chemotherapy in ESCC Stratified by ICI Types

**eFigure 6.** Sensitivity Analyses of the Outcomes by Repeating the Pooled Analyses With One Study Omitted at a Time

**eFigure 7.** Sensitivity Analyses Based on the Stage of Disease in ESCC

**eFigure 8.** Egger's Tests of the Outcomes to Detect Publication Bias

**eFigure 9.** Forest Plot of Safety Outcomes of Neoadjuvant Immunotherapy Combined With Chemotherapy

This supplemental material has been provided by the authors to give readers additional information about their work.

| <b>eTable 1. Inclusion and Exclusion Criteria.</b>                                                                                                                                                                                                                                                    |                                                                                                                                                                                                                 |
|-------------------------------------------------------------------------------------------------------------------------------------------------------------------------------------------------------------------------------------------------------------------------------------------------------|-----------------------------------------------------------------------------------------------------------------------------------------------------------------------------------------------------------------|
| <b>Inclusion Criteria</b>                                                                                                                                                                                                                                                                             | <b>Exclusion Criteria</b>                                                                                                                                                                                       |
| 1. Published as full-length articles in English                                                                                                                                                                                                                                                       | 1. Studies reporting inoperable, or metastatic disease                                                                                                                                                          |
| 2. Phase II/III clinical trials reporting resectable stage I-IV esophageal cancer (including ESCC and EAC) confirmed by tissue                                                                                                                                                                        | 2. Included patients had received prior immunotherapy or chemoradiotherapy                                                                                                                                      |
| 3. Studies that included patients who received ICIs preoperatively as monotherapy or in combination with other therapies (including chemotherapy, and chemoradiotherapy)                                                                                                                              | 3. Phase I clinical trials or real-world studies                                                                                                                                                                |
| 4. Studies reporting the complete protocol, recruited patient data and at least one primary or secondary clinical outcome, such as pCR rate, MPR rate, ORR, DCR, the incidence of side effects were more than grade 3 tr-SAE, R0 surgical resection rate, and the incidence of surgical complications | 4. Studies reporting invalid data for the efficacy and safety of neoadjuvant immunotherapy                                                                                                                      |
|                                                                                                                                                                                                                                                                                                       | 5. Studies that violated any of the inclusion criteria above. The reviewers further exclude case reports, systematic reviews or meta-analyses, and cell culture or animal studies, but not conference summaries |
| ESCC, esophageal squamous cell carcinoma; EAC, esophageal adenocarcinoma; ICI, immune checkpoint inhibitor; pCR, pathological complete response; MPR, major pathological response; ORR, objective response rate; DCR, disease control rate; tr-SAE, treatment-related severe adverse events;          |                                                                                                                                                                                                                 |

| eTable 2. Methodological quality assessment of included studies: MINORS |   |   |   |   |   |   |   |   |    |     |     |                    |
|-------------------------------------------------------------------------|---|---|---|---|---|---|---|---|----|-----|-----|--------------------|
| Study                                                                   | 1 | 2 | 3 | 4 | 5 | 6 | 7 | 8 | 9* | 11* | 12* | Score <sup>#</sup> |
| Lee et al, <sup>21</sup><br>2019                                        | 2 | 2 | 1 | 2 | 2 | 2 | 2 | 2 | NA | NA  | NA  | 15                 |
| van den Ende<br>et al, <sup>22</sup> 2019                               | 2 | 2 | 2 | 1 | 2 | 2 | 2 | 1 | NA | NA  | NA  | 14                 |
| Gu et al, <sup>23</sup><br>2020                                         | 2 | 2 | 2 | 2 | 2 | 2 | 2 | 1 | NA | NA  | NA  | 15                 |
| Zhang et al, <sup>25</sup><br>2020                                      | 2 | 2 | 1 | 2 | 2 | 2 | 2 | 2 | NA | NA  | NA  | 15                 |
| Park et al, <sup>24</sup><br>2020                                       | 2 | 2 | 1 | 1 | 2 | 1 | 2 | 1 | NA | NA  | NA  | 12                 |
| Zhang et al, <sup>40</sup><br>2021                                      | 2 | 2 | 1 | 2 | 2 | 2 | 2 | 2 | NA | NA  | NA  | 15                 |
| Duan et al, <sup>27</sup><br>2021                                       | 2 | 2 | 1 | 2 | 2 | 2 | 2 | 2 | NA | NA  | NA  | 15                 |
| Xing et al, <sup>28</sup><br>2021                                       | 2 | 2 | 1 | 2 | 2 | 2 | 2 | 1 | 2  | 2   | 2   | 23                 |
| Huang et al, <sup>29</sup><br>2021                                      | 2 | 2 | 1 | 1 | 2 | 2 | 2 | 1 | 2  | 2   | 2   | 22                 |
| Wu et al, <sup>37</sup><br>2021                                         | 2 | 2 | 2 | 1 | 2 | 2 | 2 | 1 | NA | NA  | NA  | 14                 |
| He et al, <sup>42</sup><br>2021                                         | 2 | 2 | 1 | 2 | 2 | 2 | 2 | 2 | NA | NA  | NA  | 15                 |
| Ma et al, <sup>32</sup><br>2021                                         | 2 | 2 | 2 | 2 | 2 | 2 | 2 | 1 | NA | NA  | NA  | 15                 |
| Yan et al, <sup>38</sup><br>2021                                        | 2 | 2 | 2 | 2 | 2 | 2 | 2 | 1 | NA | NA  | NA  | 15                 |
| Wang et al, <sup>35</sup><br>2021                                       | 2 | 2 | 2 | 2 | 2 | 2 | 2 | 2 | NA | NA  | NA  | 16                 |
| Zhang et al, <sup>41</sup><br>2021                                      | 2 | 2 | 2 | 2 | 2 | 2 | 2 | 1 | NA | NA  | NA  | 15                 |

|                                      |   |   |   |   |   |   |   |   |    |    |    |    |
|--------------------------------------|---|---|---|---|---|---|---|---|----|----|----|----|
| Wang et al, <sup>36</sup><br>2021    | 2 | 2 | 2 | 2 | 2 | 2 | 2 | 1 | NA | NA | NA | 15 |
| Li et al, <sup>30</sup><br>2021      | 2 | 2 | 1 | 2 | 2 | 2 | 2 | 2 | NA | NA | NA | 15 |
| Liu et al, <sup>31</sup><br>2021     | 2 | 2 | 1 | 2 | 2 | 2 | 2 | 1 | NA | NA | NA | 14 |
| Yang et al, <sup>47</sup><br>2021    | 2 | 2 | 1 | 2 | 2 | 2 | 2 | 2 | NA | NA | NA | 15 |
| Shang et al, <sup>33</sup><br>2021   | 2 | 2 | 1 | 2 | 2 | 2 | 2 | 1 | NA | NA | NA | 14 |
| Liu et al, <sup>43</sup><br>2021     | 2 | 2 | 2 | 2 | 2 | 2 | 2 | 1 | NA | NA | NA | 15 |
| Shen et al, <sup>34</sup><br>2021    | 2 | 2 | 1 | 2 | 2 | 2 | 2 | 2 | NA | NA | NA | 15 |
| Yang et al, <sup>39</sup><br>2021    | 2 | 2 | 1 | 2 | 2 | 2 | 2 | 1 | NA | NA | NA | 14 |
| Athauda et al, <sup>26</sup><br>2021 | 2 | 2 | 1 | 1 | 2 | 2 | 2 | 1 | NA | NA | NA | 13 |
| Sun et al, <sup>45</sup><br>2022     | 2 | 2 | 1 | 2 | 2 | 2 | 2 | 1 | NA | NA | NA | 14 |
| Liu et al, <sup>44</sup><br>2022     | 2 | 2 | 1 | 2 | 2 | 2 | 2 | 2 | NA | NA | NA | 15 |
| Xu et al, <sup>46</sup><br>2022      | 2 | 2 | 2 | 2 | 2 | 2 | 2 | 1 | NA | NA | NA | 15 |

\*, For comparative studies only.

#, Scores of at least 75% were considered high quality with low risk for bias; scores between 50% and 75% were considered medium risk for bias; scores of less than or equal to 50% were considered high risk for bias. For noncomparative studies, the maximum score was 16, while the maximum score for comparative studies was 24.

MINORS, Methodological index for non-randomized studies

| Attachment: MINORS Evaluation Criteria                                                                                                                                                                                                                                                                                                     |                    |
|--------------------------------------------------------------------------------------------------------------------------------------------------------------------------------------------------------------------------------------------------------------------------------------------------------------------------------------------|--------------------|
| Methodological items for non-randomized studies                                                                                                                                                                                                                                                                                            | Score <sup>#</sup> |
| 1. <b>A clearly stated aim:</b> the question addressed should be precise and relevant in the light of available literature                                                                                                                                                                                                                 |                    |
| 2. <b>Inclusion of consecutive patients:</b> all patients potentially fit for inclusion (satisfying the criteria for inclusion) have been included in the study during the study period (no exclusion or details about the reasons for exclusion)                                                                                          |                    |
| 3. <b>Prospective collection of data:</b> data were collected according to a protocol established before the beginning of the study                                                                                                                                                                                                        |                    |
| 4. <b>Endpoints appropriate to the aim of the study:</b> unambiguous explanation of the criteria used to evaluate the main outcome which should be in accordance with the question addressed by the study. Also, the endpoints should be assessed on an intention-to-treat basis.                                                          |                    |
| 5. <b>Unbiased assessment of the study endpoint:</b> blind evaluation of objective endpoints and double-blind evaluation of subjective endpoints. Otherwise the reasons for not blinding should be stated                                                                                                                                  |                    |
| 6. <b>Follow-up period appropriate to the aim of the study:</b> the follow-up should be sufficiently long to allow the assessment of the main endpoint and possible adverse events                                                                                                                                                         |                    |
| 7. <b>Loss to follow up less than 5%:</b> all patients should be included in the follow up. Otherwise, the proportion lost to follow up should not exceed the proportion experiencing the major endpoint                                                                                                                                   |                    |
| 8. <b>Prospective calculation of the study size:</b> information of the size of detectable difference of interest with a calculation of 95% confidence interval, according to the expected incidence of the outcome event, and information about the level for statistical significance and estimates of power when comparing the outcomes |                    |
| <i>Additional criteria in the case of comparative study</i>                                                                                                                                                                                                                                                                                |                    |
| 9. <b>An adequate control group:</b> having a gold standard diagnostic test or therapeutic intervention recognized as the optimal intervention according to the available published data                                                                                                                                                   |                    |
| 10. <b>Contemporary groups:</b> control and studied group should be managed during the same time period (no historical comparison)                                                                                                                                                                                                         |                    |
| 11. <b>Baseline equivalence of groups:</b> the groups should be similar regarding the criteria other than the studied endpoints. Absence of confounding factors that could bias the interpretation of the results                                                                                                                          |                    |
| 12. <b>Adequate statistical analyses:</b> whether the statistics were in accordance with the type of study with calculation of confidence intervals or relative risk                                                                                                                                                                       |                    |
| # The items are scored 0 (not reported), 1 (reported but inadequate) or 2 (reported and adequate). The global ideal score being 16 for non-comparative studies and 24 for comparative studies.                                                                                                                                             |                    |

| <b>eTable 3.</b> Summary of surgical complications in included studies. |    |                                      |                  |                         |                     |                    |             |                            |                      |                            |                   |                 |                        |                      |            |
|-------------------------------------------------------------------------|----|--------------------------------------|------------------|-------------------------|---------------------|--------------------|-------------|----------------------------|----------------------|----------------------------|-------------------|-----------------|------------------------|----------------------|------------|
|                                                                         | N  | Overall surgical complication, N (%) | Pneumonia, N (%) | Pleural effusion, N (%) | Pneumothorax, N (%) | Chylothorax, N (%) | ARDS, N (%) | Respiratory failure, N (%) | Heart failure, N (%) | Anastomotic fistula, N (%) | Hoarseness, N (%) | Bleeding, N (%) | Wound infection, N (%) | ICU treatment, N (%) | Die, N (%) |
| Lee et al, <sup>21</sup> 2019                                           | 26 | -                                    | -                | -                       | -                   | -                  | -           | -                          | -                    | -                          | -                 | -               | -                      | -                    | -          |
| Zhang et al, <sup>40</sup> 2021                                         | 23 | -                                    | 15 (65.2%)       | 10 (43.5%)              | -                   | 1 (4.3%)           | -           | -                          | -                    | 3 (13.0%)                  | 1 (4.3%)          | 1 (4.3%)        | -                      | -                    | -          |
| Duan et al, <sup>27</sup> 2021                                          | 17 | -                                    | 6 (35.2%)        | -                       | -                   | -                  | 2 (11.8%)   | 2 (11.8%)                  | 4 (23.5%)            | 2 (11.8%)                  | 5 (29.4%)         | -               | -                      | -                    | -          |
| Xing et al, <sup>28</sup> 2021                                          | 11 | -                                    | 5 (45.5%)        | -                       | -                   | -                  | -           | -                          | -                    | 1 (9.1%)                   | -                 | -               | -                      | -                    | -          |
| Huang et al, <sup>29</sup> 2021                                         | 21 | -                                    | -                | -                       | -                   | -                  | -           | -                          | -                    | -                          | -                 | -               | -                      | -                    | -          |
| Wu et al, <sup>37</sup> 2021                                            | 38 | 10 (26.3%)                           | 9 (23.7%)        | -                       | -                   | 1 (2.9%)           | -           | -                          | -                    | -                          | -                 | -               | 1 (2.9%)               | 5 (14.3%)            | -          |
| He et al, <sup>42</sup> 2021                                            | 16 | -                                    | -                | -                       | -                   | -                  | -           | -                          | -                    | -                          | -                 | -               | -                      | -                    | -          |
| Gu et al, <sup>23</sup> 2020                                            | 15 | -                                    | -                | -                       | -                   | -                  | -           | -                          | -                    | -                          | -                 | -               | -                      | -                    | -          |
| Ma et al, <sup>32</sup> 2021                                            | 7  | -                                    | -                | -                       | -                   | -                  | -           | -                          | -                    | -                          | -                 | -               | -                      | -                    | -          |
| Yan et al, <sup>38</sup> 2021                                           | 36 | -                                    | -                | -                       | -                   | -                  | -           | -                          | -                    | -                          | -                 | -               | -                      | -                    | -          |

|                                           |        |               |               |           |             |              |   |   |             |              |               |             |             |             |   |
|-------------------------------------------|--------|---------------|---------------|-----------|-------------|--------------|---|---|-------------|--------------|---------------|-------------|-------------|-------------|---|
| Sun et al, <sup>45</sup><br>2022          | 2<br>6 | -             | -             | -         | -           | -            | - | - | -           | -            | -             | -           | -           | -           | - |
| Wang et al, <sup>35</sup><br>2021         | 1<br>2 | -             | -             | -         | -           | -            | - | - | -           | -            | -             | -           | -           | -           | - |
| Liu et al, <sup>44</sup><br>2022          | 5<br>1 | 24<br>(47.1%) | 5<br>9.8%     | 3<br>5.9% | 2<br>(3.9%) | 4<br>(7.8%)  | - | - | 2<br>(3.9%) | -            | 13<br>(25.5%) | -           | -           | 1<br>(2.0%) | - |
| Zhang et al, <sup>41</sup><br>2021        | 4<br>0 | -             | -             | -         | -           | -            | - | - | -           | -            | -             | -           | -           | -           | - |
| Xu et al, <sup>46</sup><br>2022           | 4<br>6 | -             | -             | -         | -           | -            | - | - | -           | -            | -             | -           | -           | -           | - |
| Wang et al, <sup>36</sup><br>2021         | 2<br>4 | -             | -             | -         | -           | -            | - | - | -           | -            | -             | -           | -           | -           | - |
| Liu et al, <sup>31</sup><br>2021          | 2<br>8 | -             | -             | -         | -           | -            | - | - | -           | 1<br>(3.6%)  | -             | -           | -           | -           | - |
| Liu et al, <sup>31</sup><br>2021          | 1<br>8 | -             | -             | -         | -           | -            | - | - | -           | -            | -             | -           | -           | -           | - |
| van den Ende et al, <sup>22</sup><br>2019 | 3<br>3 | -             | 10<br>(30.3%) | -         | -           | 5<br>(15.2%) | - | - | -           | 7<br>(21.2%) | -             | -           | -           | -           | - |
| Yang et al, <sup>47</sup><br>2021         | 2<br>0 | -             | -             | -         | -           | -            | - | - | -           | 2<br>(10.0%) | 1<br>(5.0%)   | 1<br>(5.0%) | 1<br>(5.0%) | -           | - |
| Zhang et al, <sup>25</sup><br>2020        | 1<br>8 | -             | -             | -         | -           | -            | - | - | -           | -            | -             | -           | -           | -           | - |

|                                   |    |            |           |           |          |          |           |           |   |           |           |   |          |   |          |
|-----------------------------------|----|------------|-----------|-----------|----------|----------|-----------|-----------|---|-----------|-----------|---|----------|---|----------|
| Shang et al, <sup>33</sup> 2021   | 29 | -          | -         | -         | -        | -        | -         | -         | - | -         | -         | - | -        | - | -        |
| Liu et al, <sup>43</sup> 2021     | 51 | 14 (27.5%) | 7 (13.7%) | 3 (5.9%)  | 2 (3.9%) | -        | -         | -         | - | 3 (5.9%)  | 5 (9.8%)  | - | 1 (2.0%) | - | -        |
| Park et al, <sup>24</sup> 2020    | 16 | 11 (68.8%) | -         | -         | -        | -        | 3 (18.8%) | 3 (18.8%) | - | 3 (18.8%) | 3 (18.8%) | - | 1 (6.3%) | - | 2 (12.5) |
| Shen et al, <sup>34</sup> 2021    | 27 | -          | 3 (11.1%) | 4 (14.8%) | -        | 2 (7.4%) | -         | -         | - | 5 (18.5%) | 2 (7.4%)  | - | -        | - | -        |
| Yang et al, <sup>39</sup> 2021    | 12 | 2 (16.7%)  | -         | -         | -        | -        | -         | -         | - | 2 (16.7%) | -         | - | -        | - | -        |
| Athauda et al, <sup>26</sup> 2021 | 15 | 5 (33.3%)  | -         | -         | -        | -        | -         | -         | - | 1 (6.7%)  | -         | - | -        | - | -        |

N, number; ARDS, acute respiratory distress syndrome; ICU, intensive care unit



**eFigure 1.** The geographical distribution of included studies. Color depth is proportional to the number of included studies, including 22 in China, 2 in South Korea, 1 in Germany, 1 in the Netherlands, and 1 in the USA.

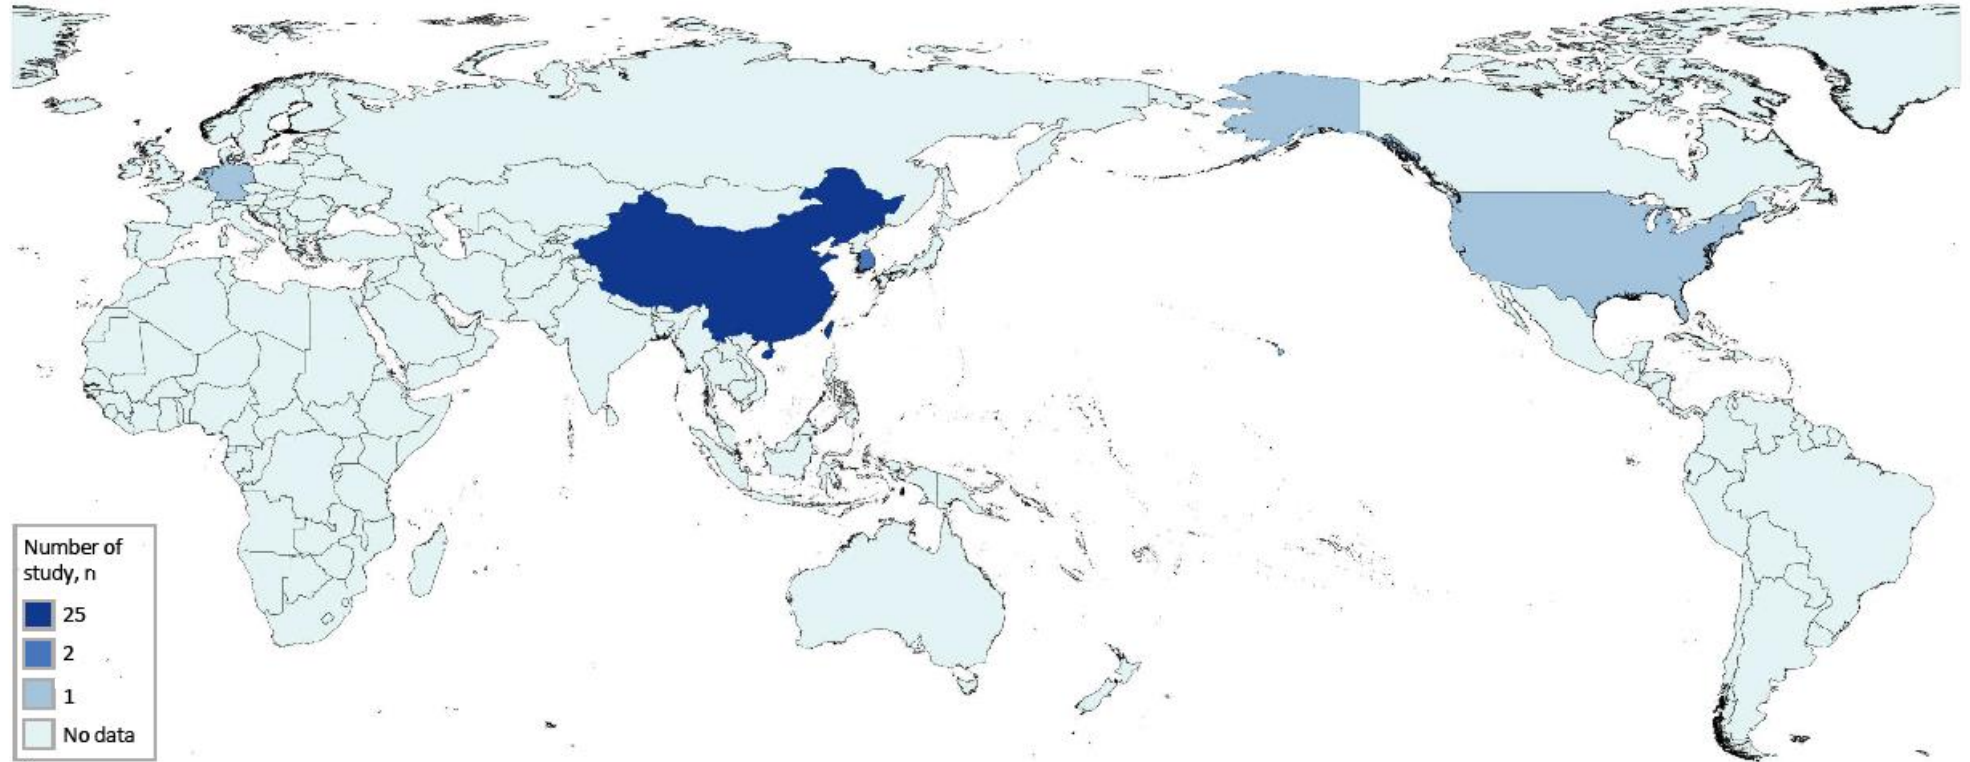

**eFigure 2.** Methodological quality assessment of included studies. \*, For comparative studies only. #, Scores of at least 75% were considered high quality with low risk for bias; scores between 50% and 75% were considered medium risk for bias; scores of less than or equal to 50% were considered high risk for bias. For noncomparative studies, the maximum score was 16, while the maximum score for comparative studies was 24.

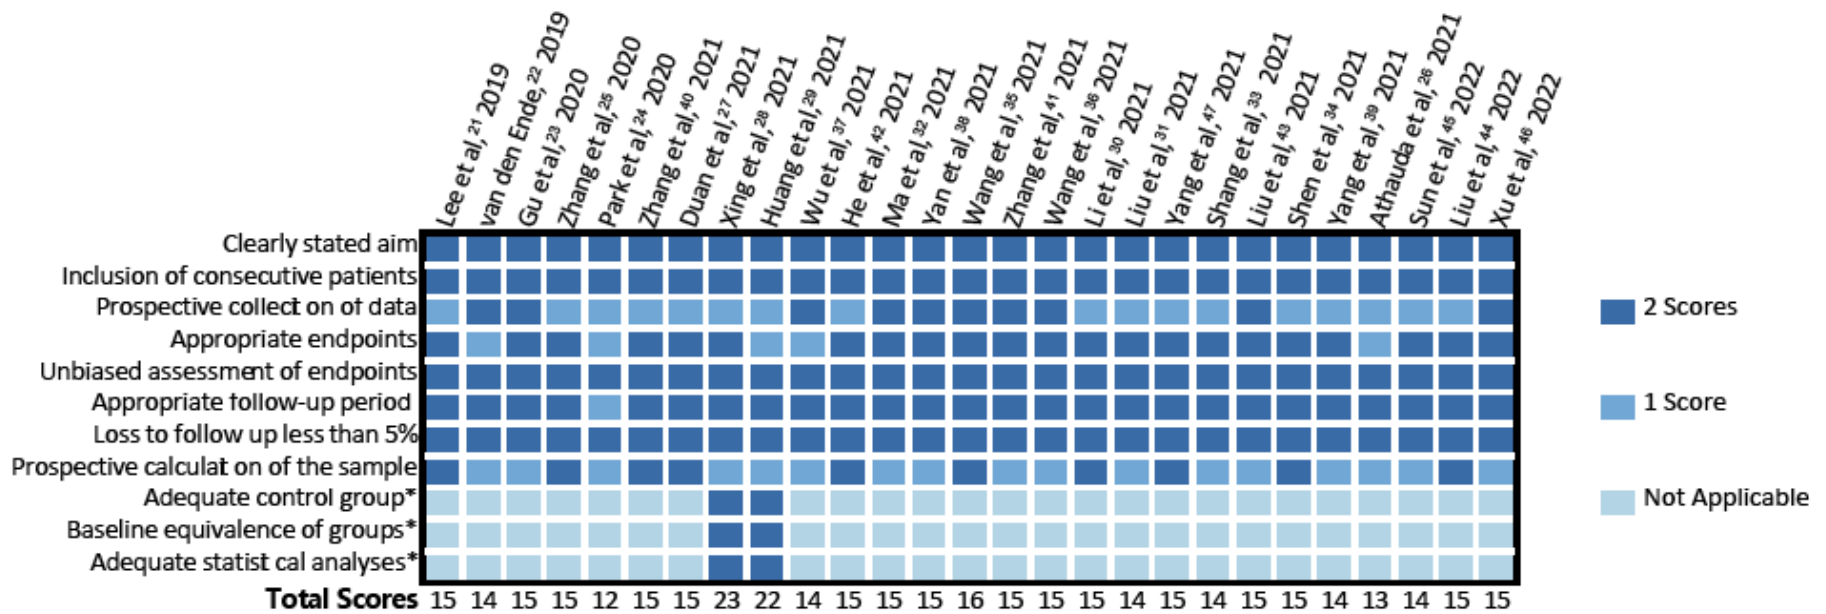

**eFigure 3.** Forest plot of the primary outcomes for efficacy in neoadjuvant immunotherapy combined with chemotherapy in ESCC stratified by ICI types. (A) the pCR rate, (B) the MPR rate. CI, confidence interval; ESCC, esophageal squamous cell carcinoma; ICI, immune-checkpoint inhibitors; pCR, pathological

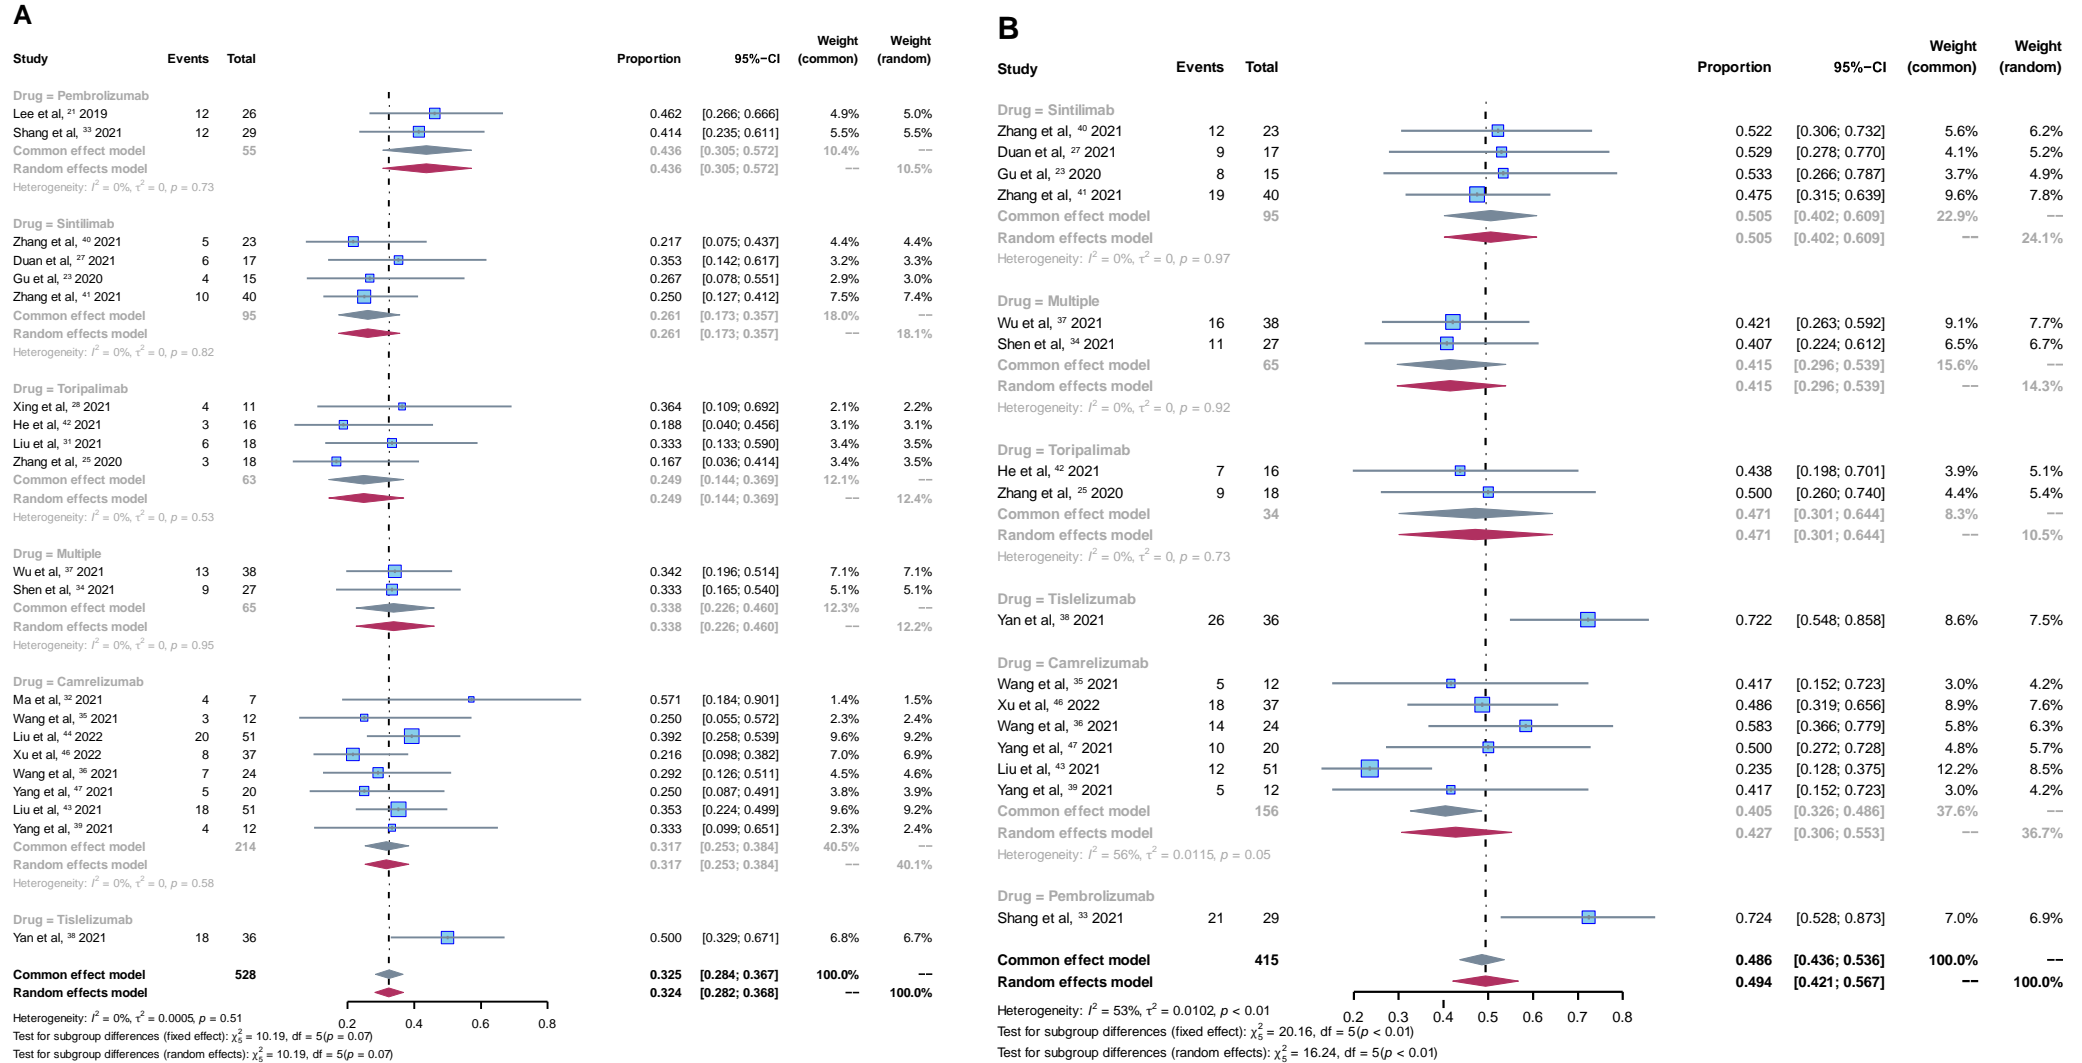

complete response; MPR, major pathological response

**eFigure 4.** Forest plot of the secondary outcomes for efficacy in neoadjuvant immunotherapy combined with chemotherapy in ESCC stratified by ICI types. (A) CR, (B) PR, (C) SD, (D) ORR, (E) DCR. CI, confidence interval; ESCC, esophageal squamous cell carcinoma; ICI, immune-checkpoint inhibitors; PR, partial response; CR, complete response; SD, stable disease; ORR, objective response rate; DCR, disease control rate

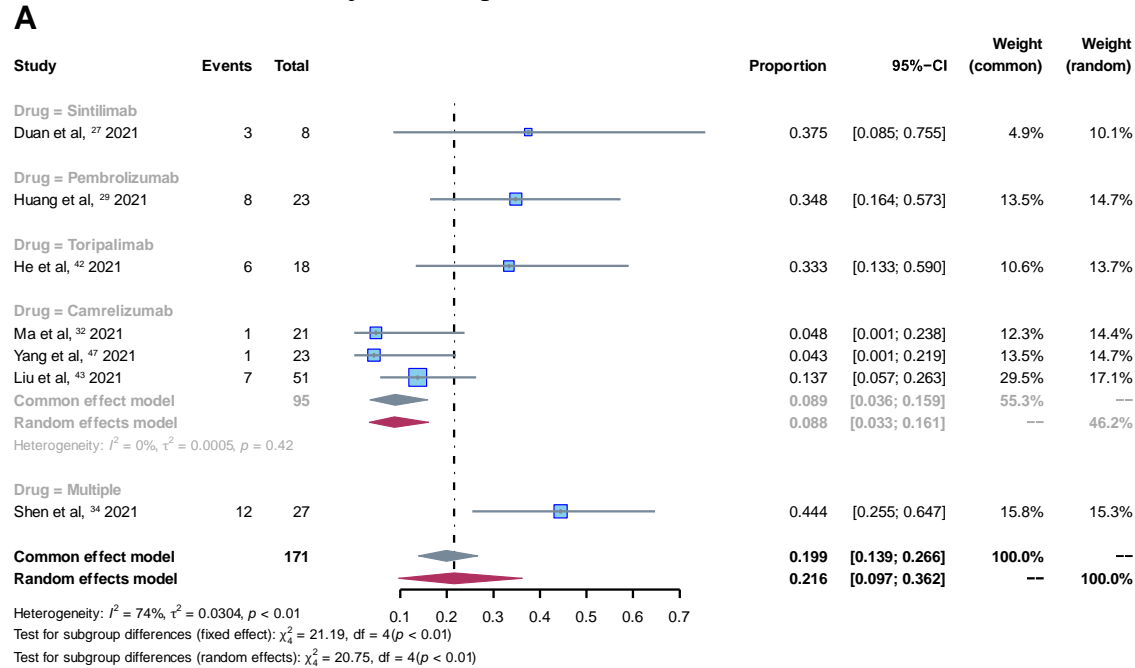

# B

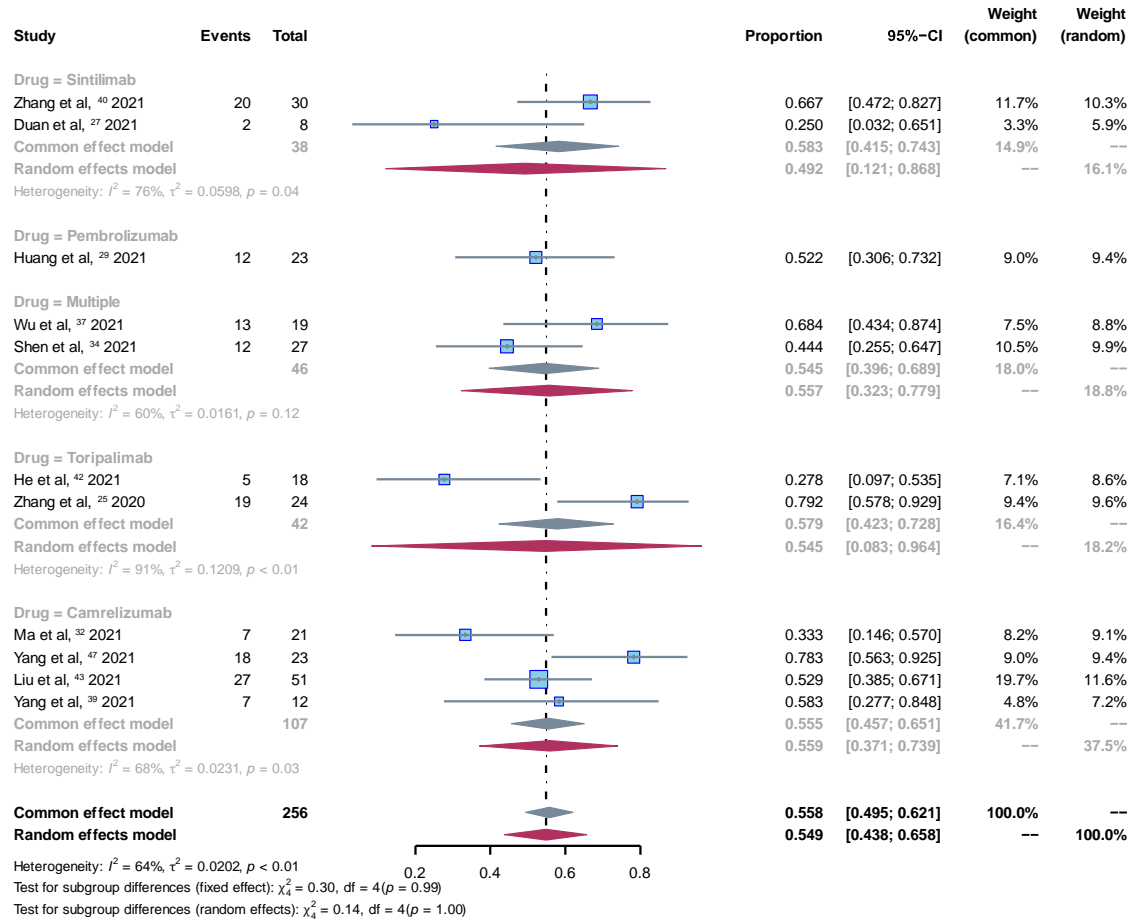

### C

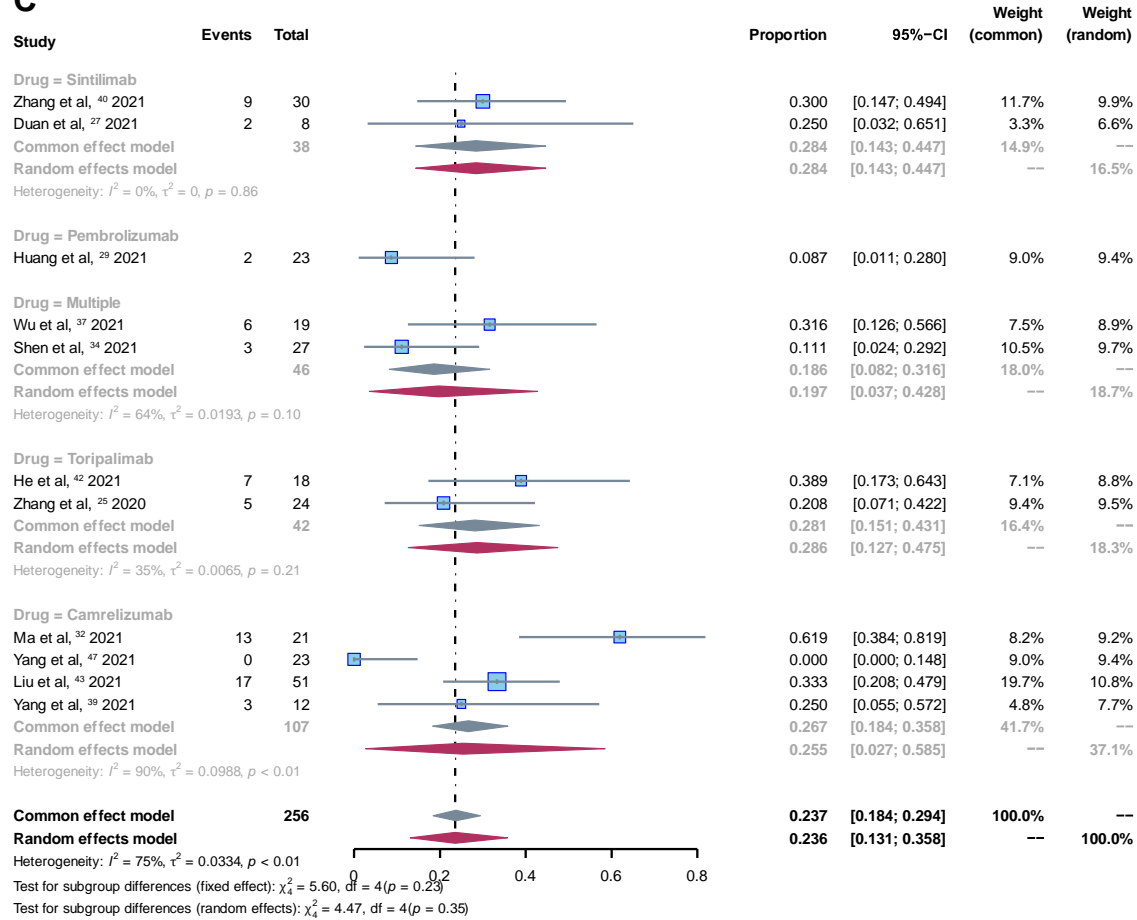

# D

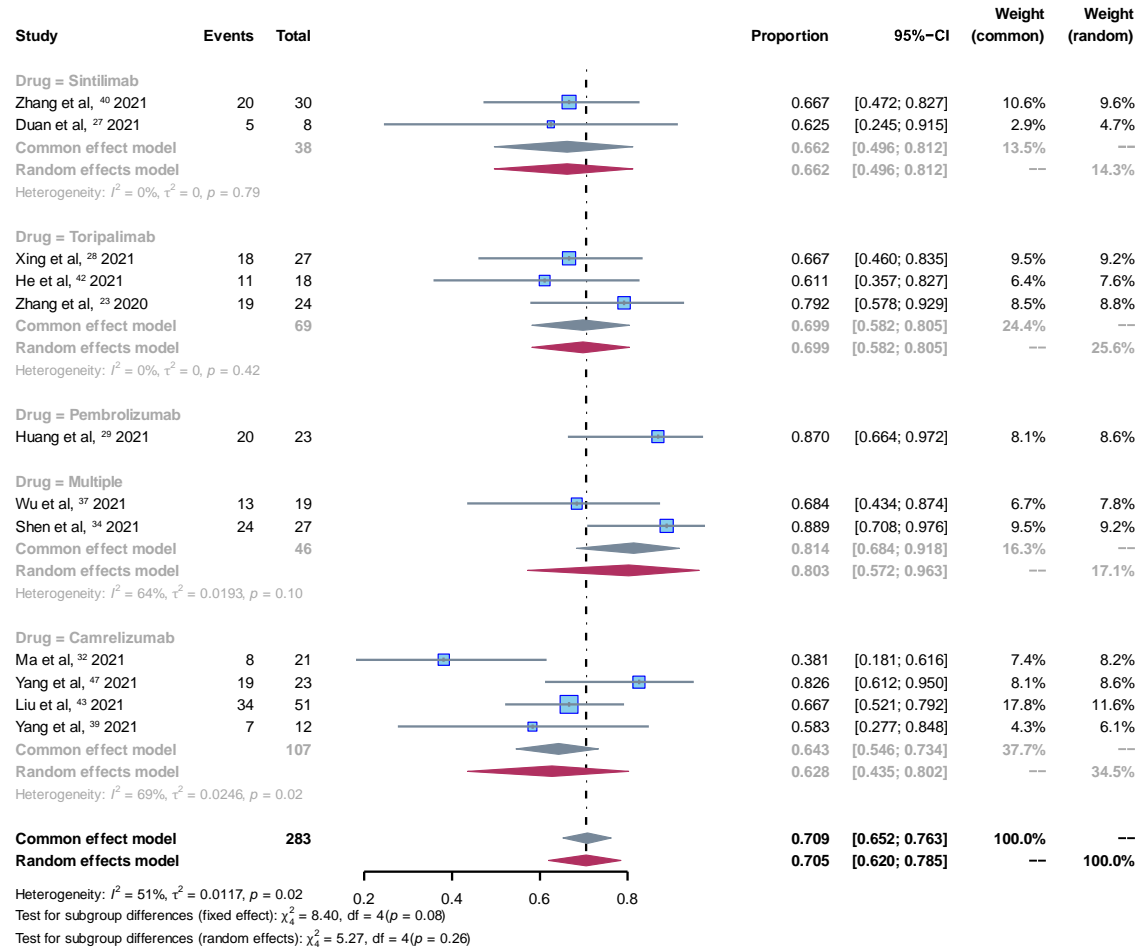

# E

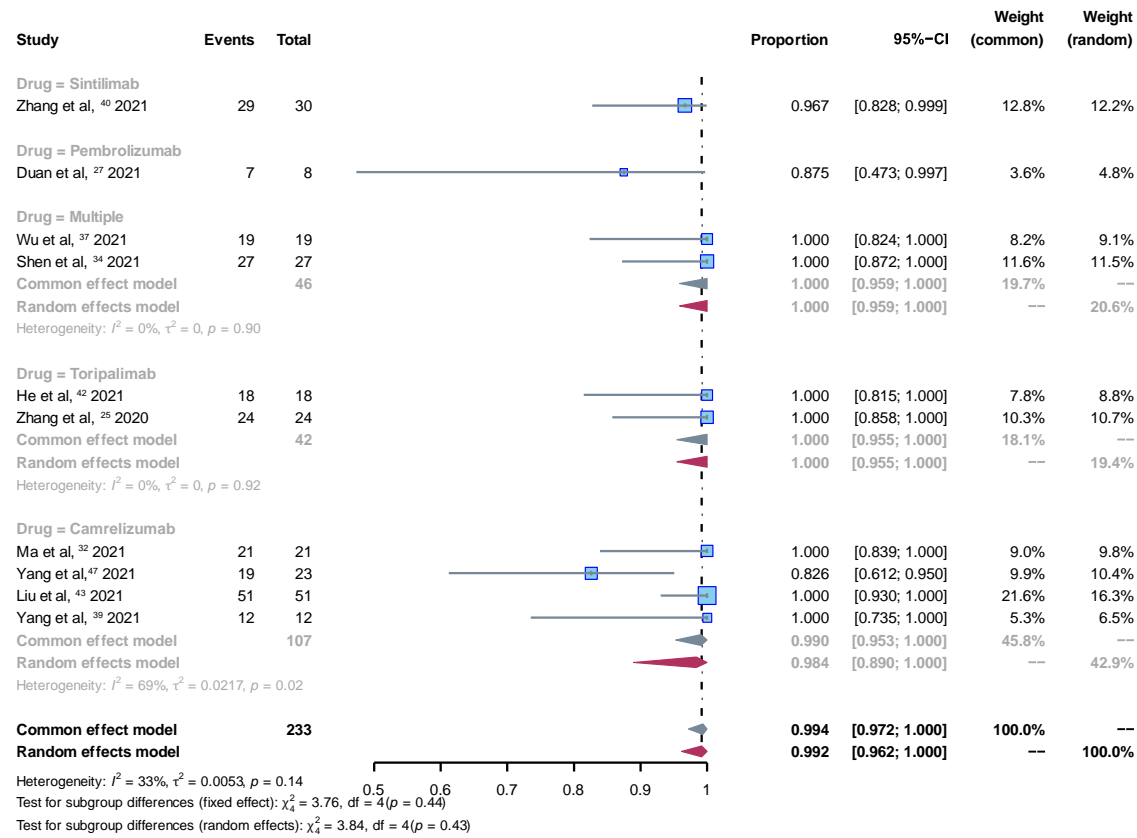



**eFigure 5.** Forest plot of the outcomes for safety in neoadjuvant immunotherapy combined with chemotherapy in ESCC stratified by ICI types. (A) the incidence of tr-SAE, (B) R0 surgical resection rate. CI, confidence interval; ESCC, esophageal squamous cell carcinoma; ICI, immune-checkpoint inhibitors; tr-SAE, treatment-related severe adverse events

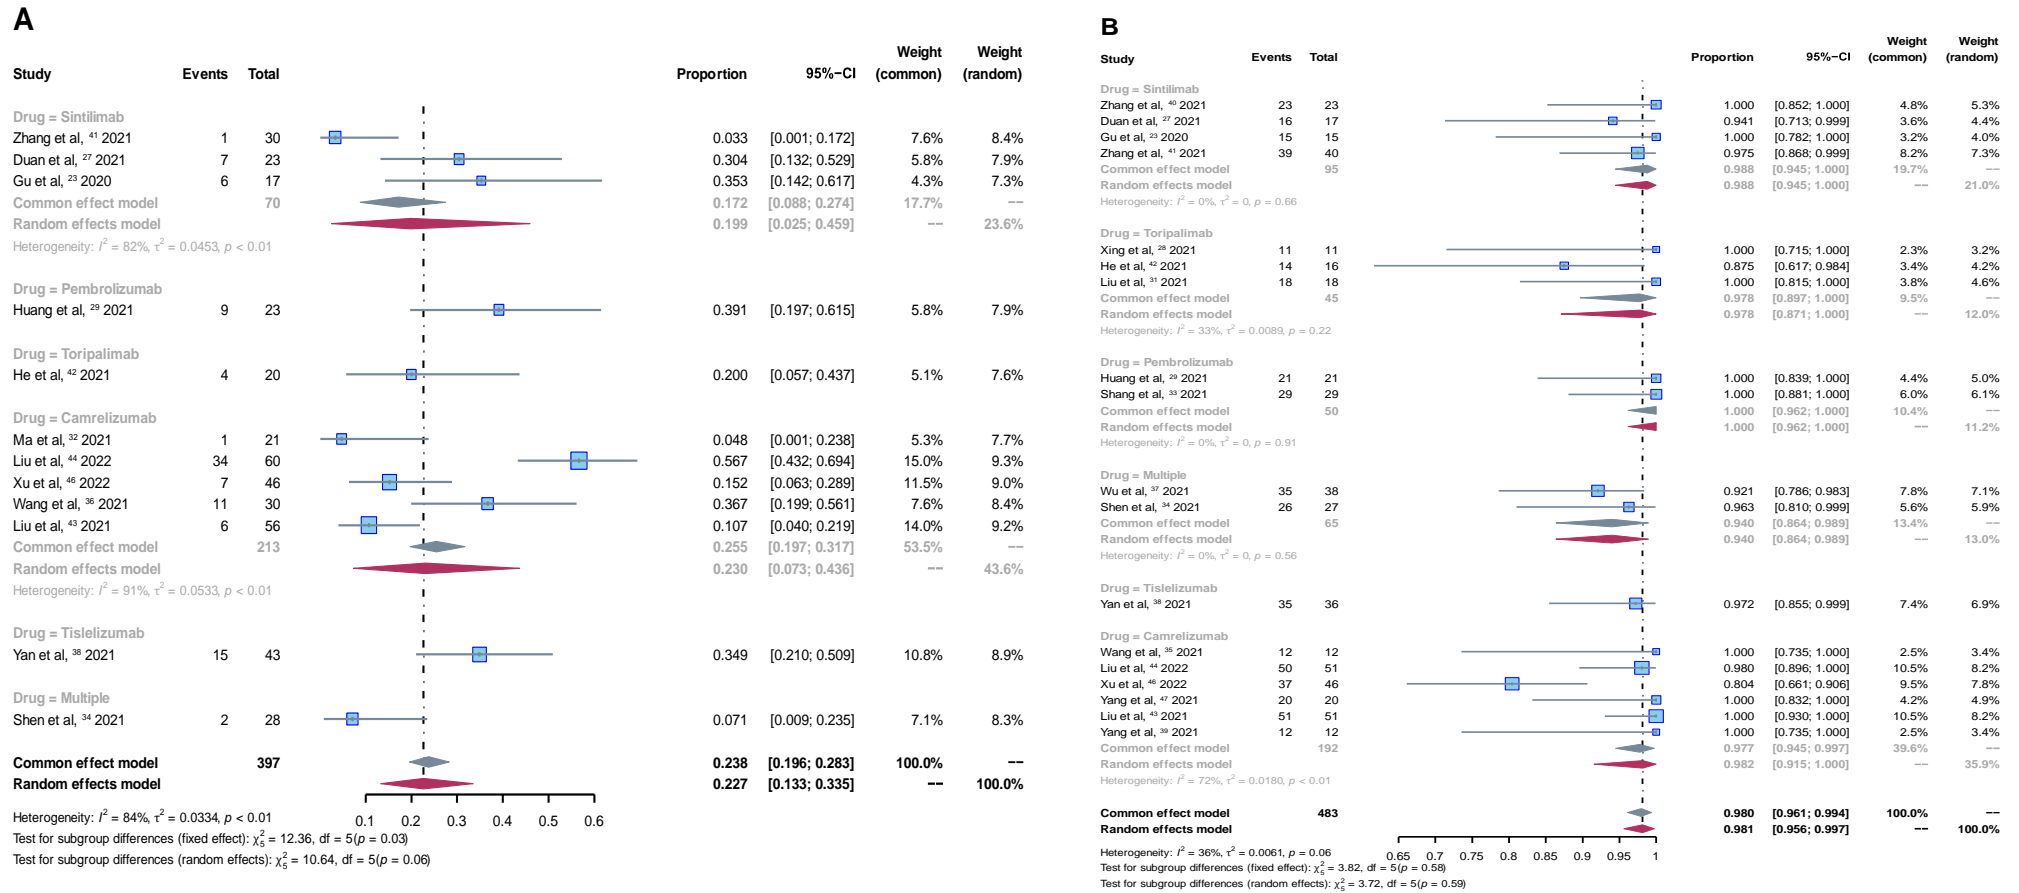

**eFigure 6.** Sensitivity analyses of the outcomes by repeating the pooled analyses with one study omitted at a time. (A) pCR rate, (B) MPR rate, (C) the incidence of tr-SAE, (D) R0 surgical resection rate. CI, confidence interval; pCR, pathological complete response; MPR, major pathological response; tr-SAE, treatment-related severe adverse events

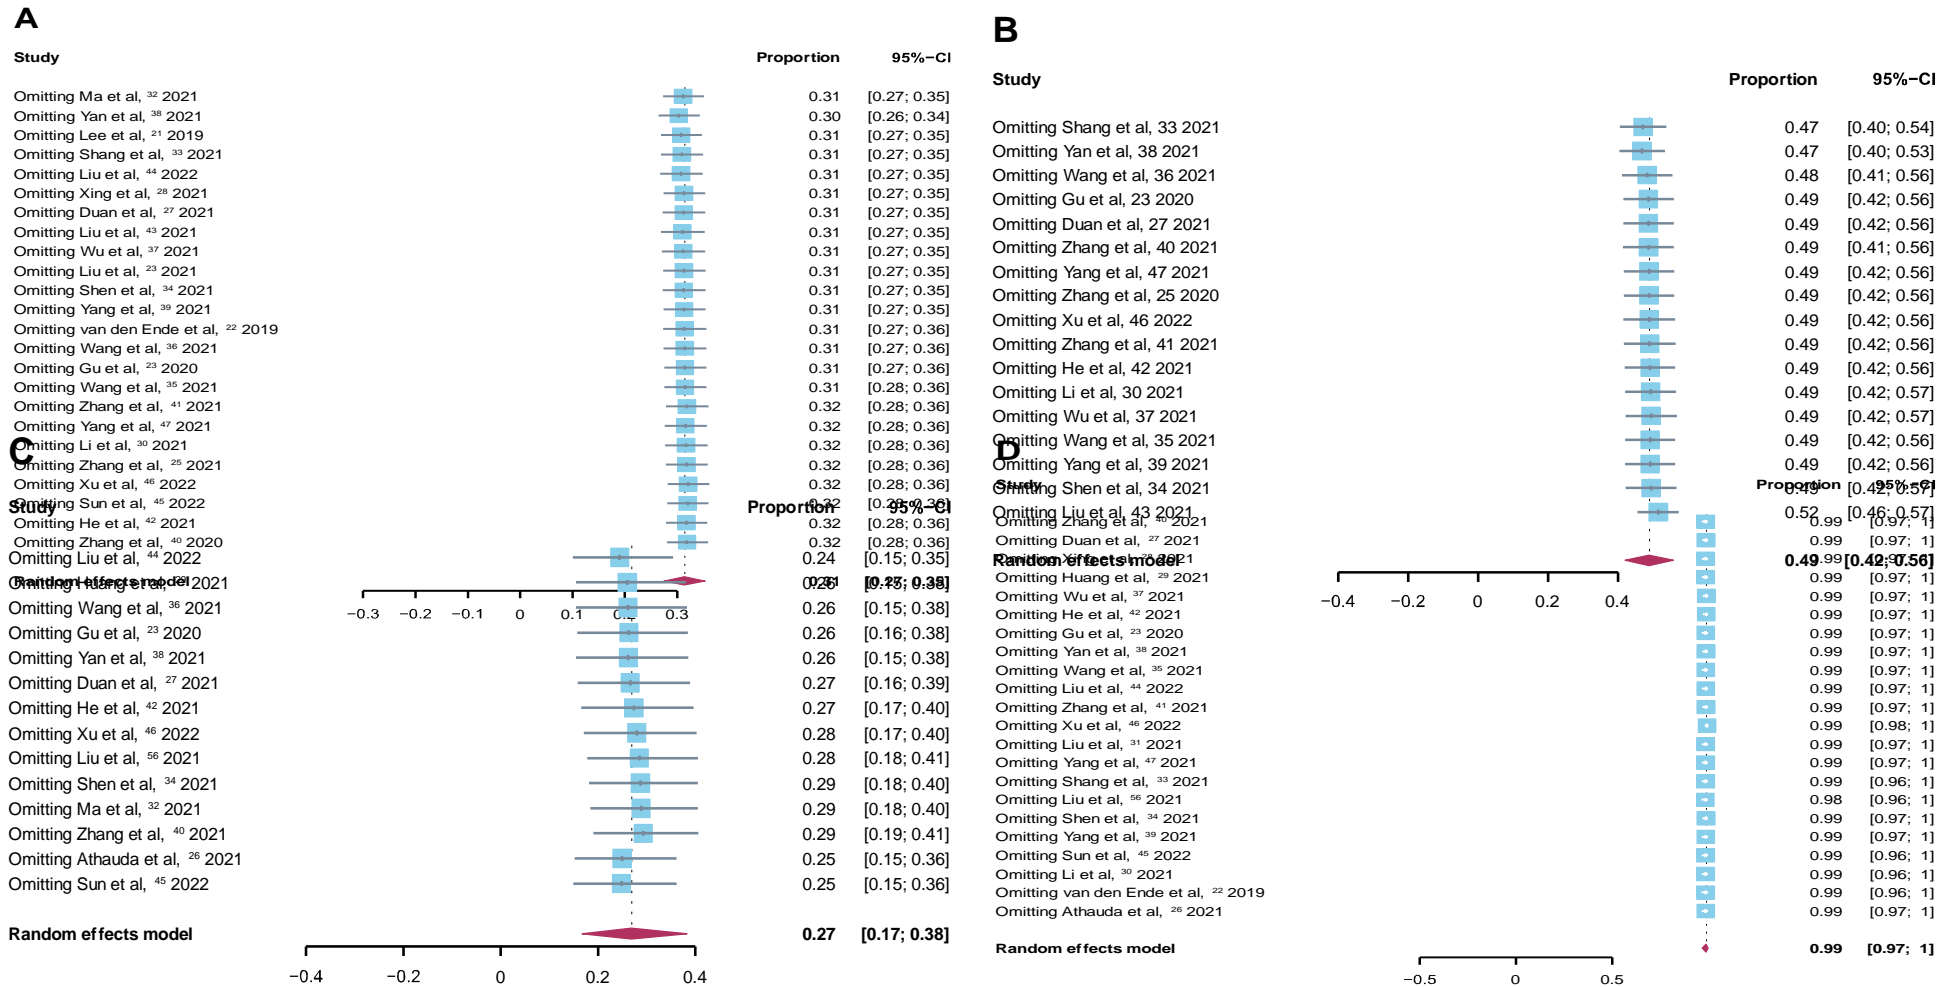

**eFigure 7.** Sensitivity analyses based on the stage of disease in ESCC. (A) pCR rate, (B) MPR rate, (C) R0 surgical resection rate. (D) ORR, (E) DCR. CI, confidence interval; ESCC, esophageal squamous cell carcinoma; pCR, pathological complete response; MPR, major pathological response; ORR, objective response rate; DCR, disease control rate

**A**

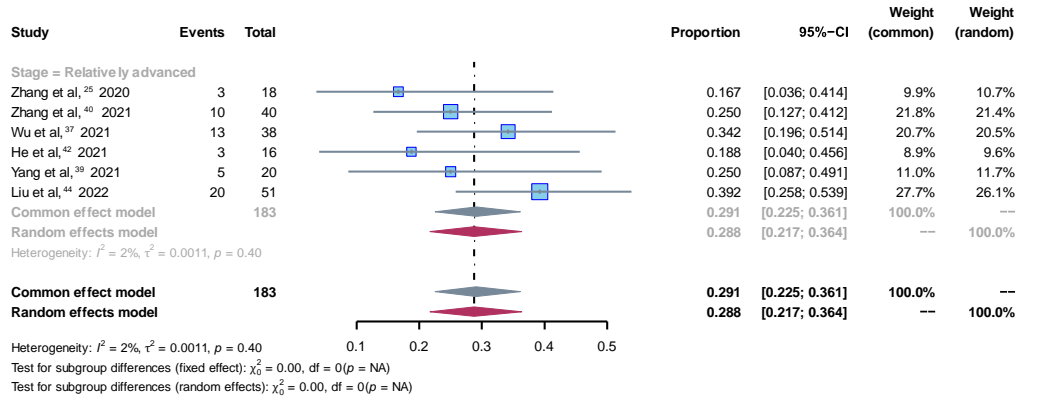

**B**

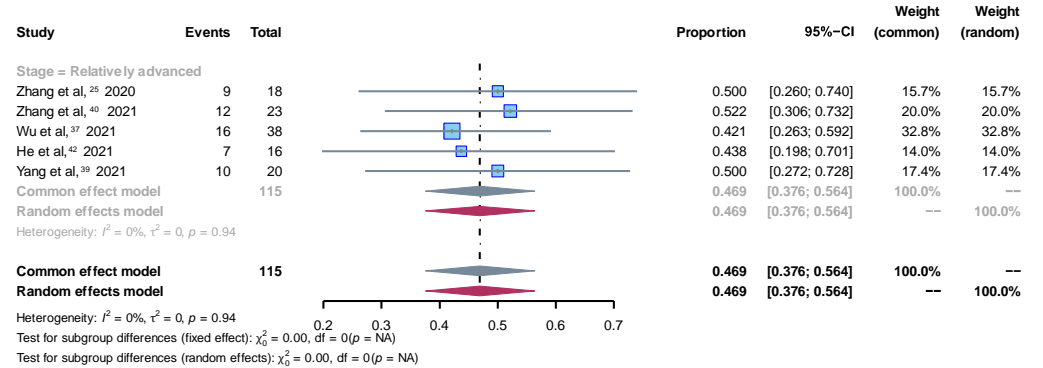

**C**

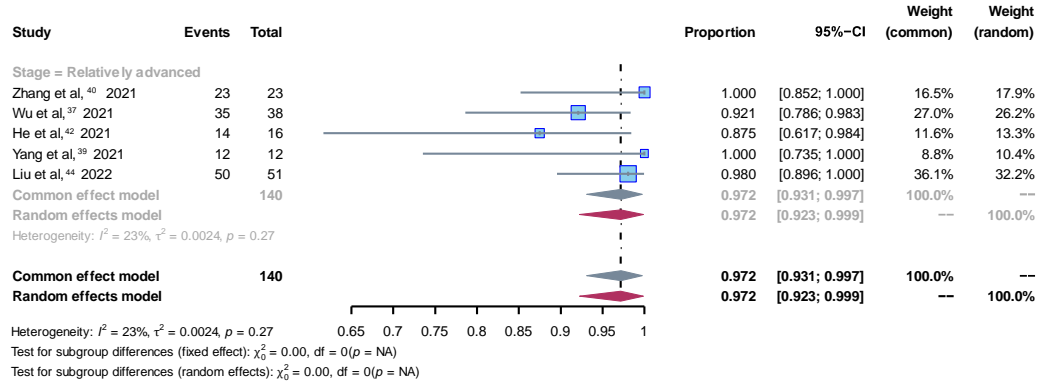

**D**

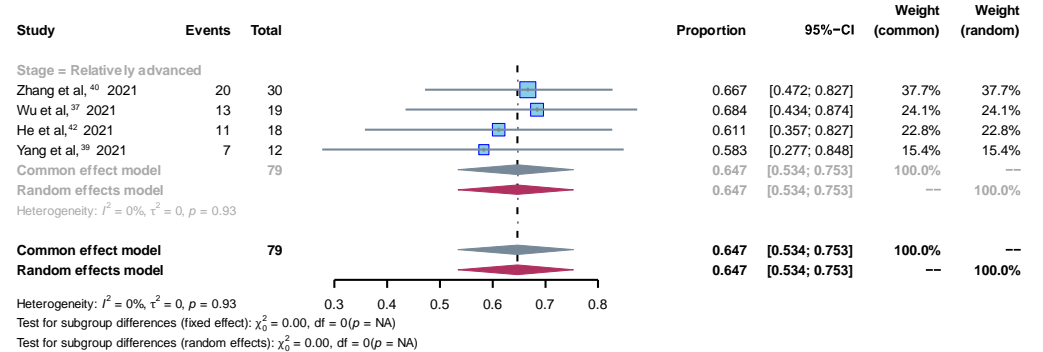

# E

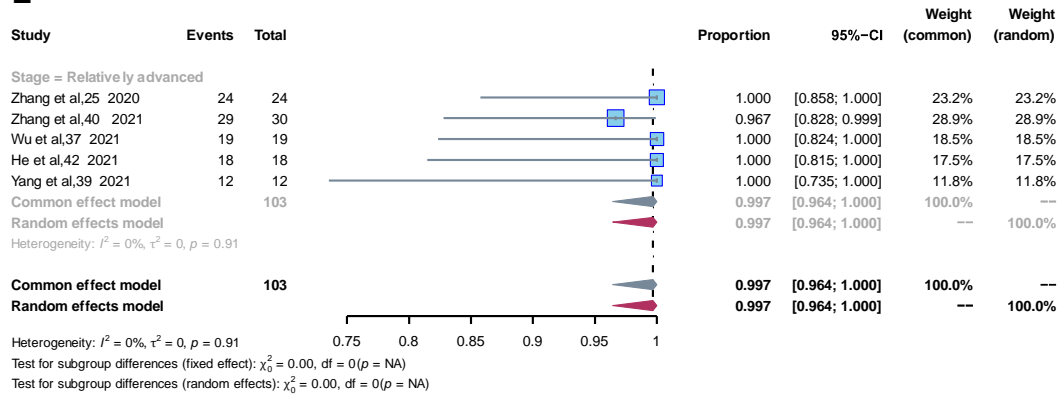

**eFigure 8.** Egger's tests of the outcomes to detect publication bias. (A) pCR rate, (B) MPR rate, (C) the incidence of tr-SAE, (D) R0 surgical resection rate. CI, confidence interval; pCR, pathological complete response; MPR, major pathological response; tr-SAE, treatment-related severe adverse events

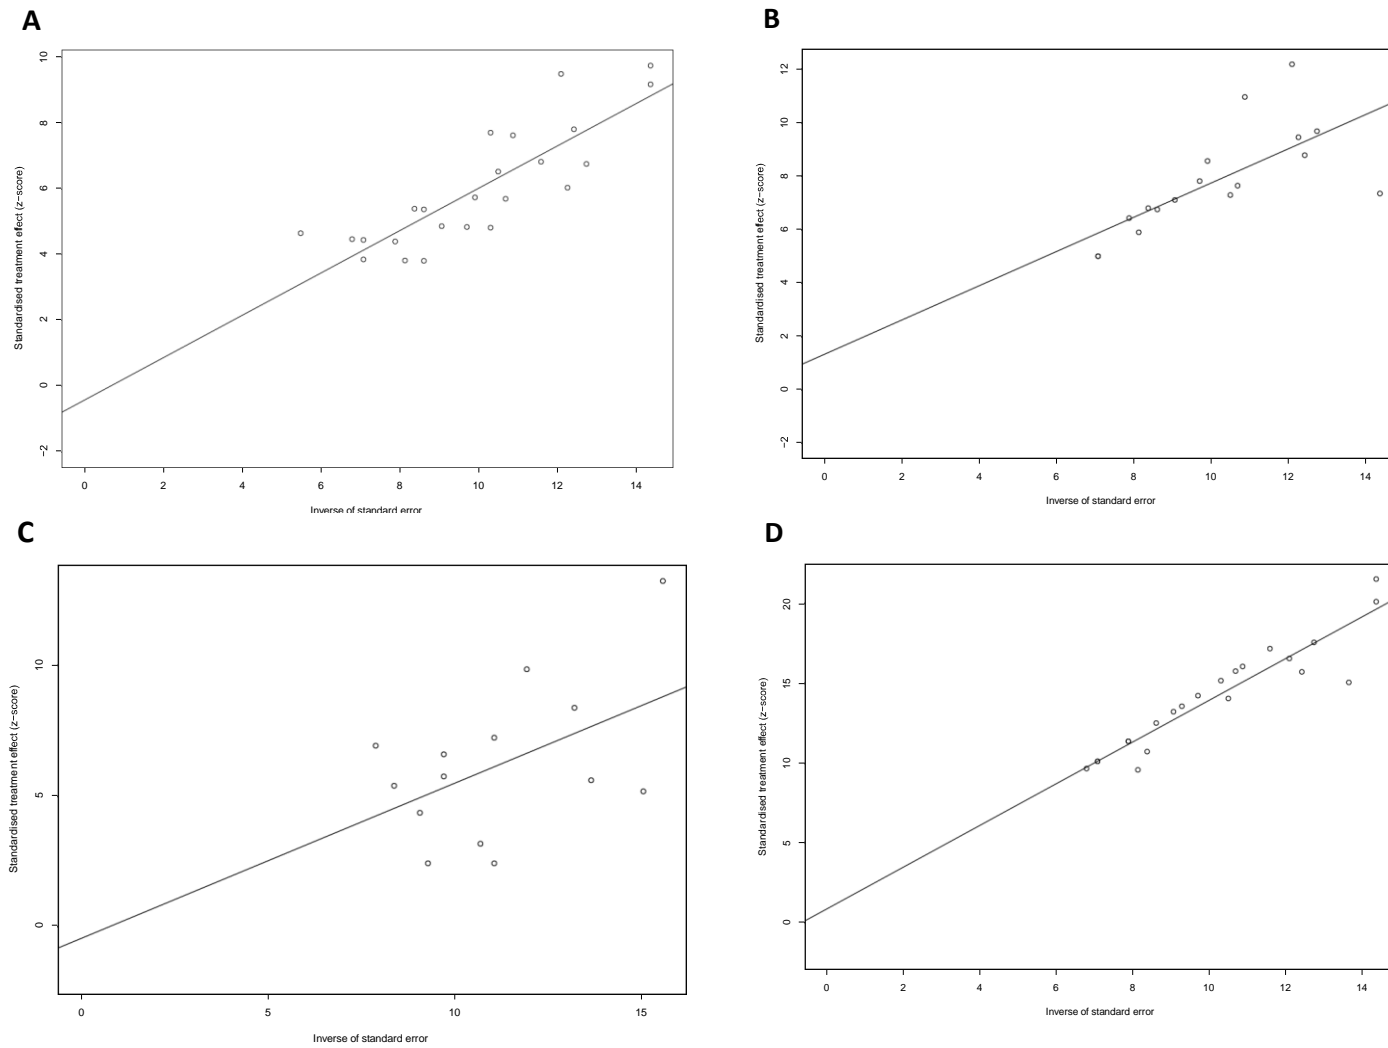

**eFigure 9.** Forest Plot of Safety Outcomes of Neoadjuvant Immunotherapy Combined With Chemotherapy

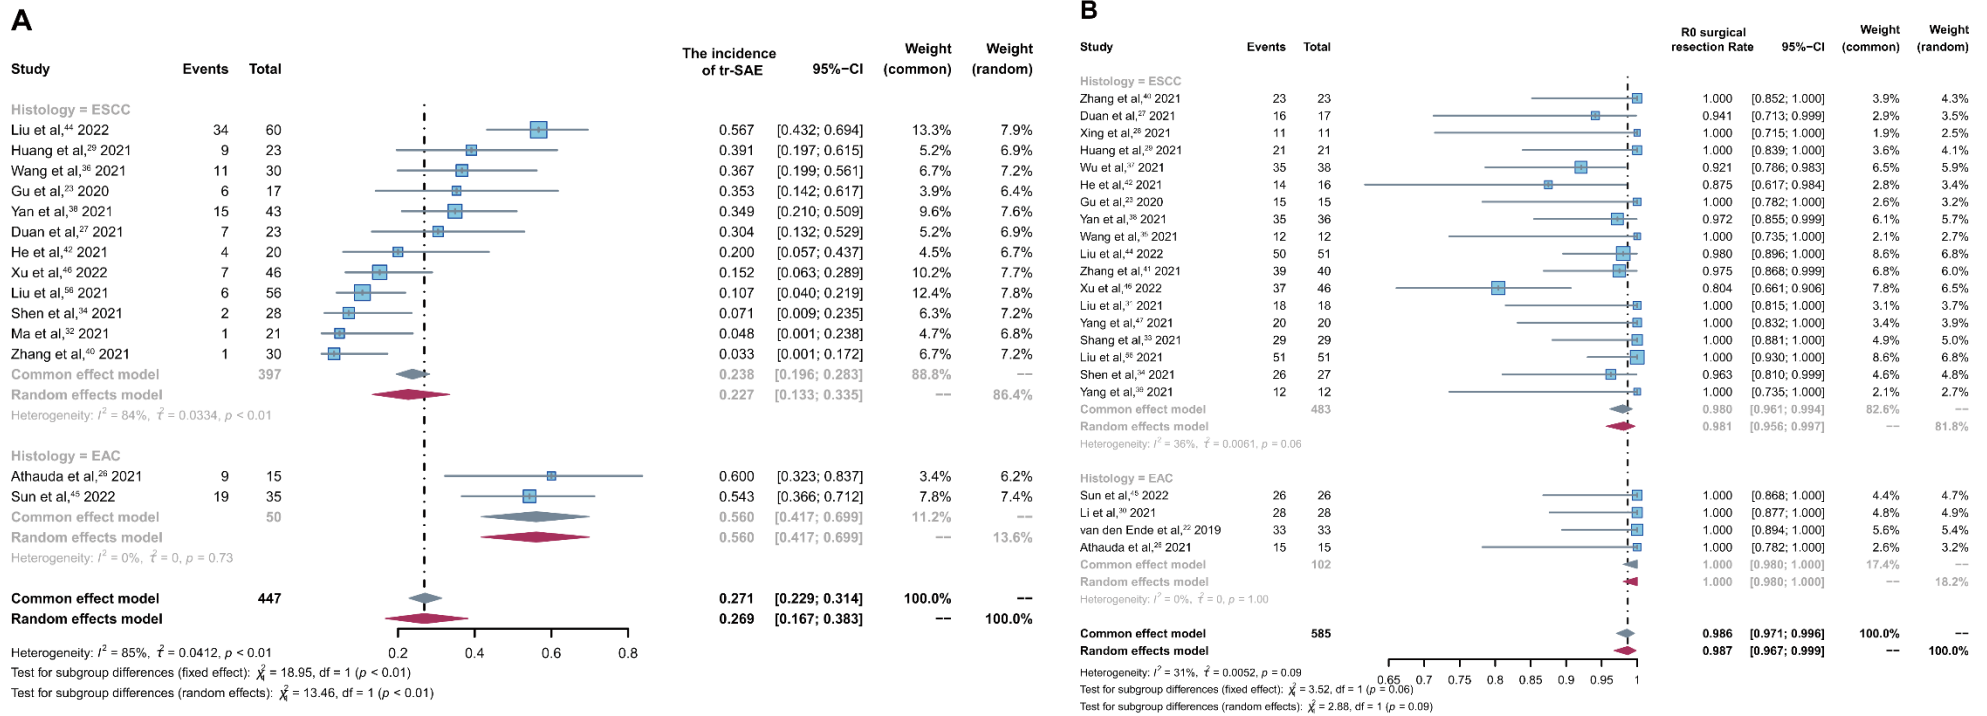

Supplement: jamanetwopen-e2239778-s001.pdf [file jamanetwopen-e2239778-s001.pdf]
